# Supplementary material
Source: Springer Nature journal article supplement (https://www.springermedizin.de/resource/supplementary/12885_2010_2645_MOESM1_ESM.pdf/9461664)
Supplement: MOESM1 [file 9461664]

### Stomach Cancer (age at diag. <50)

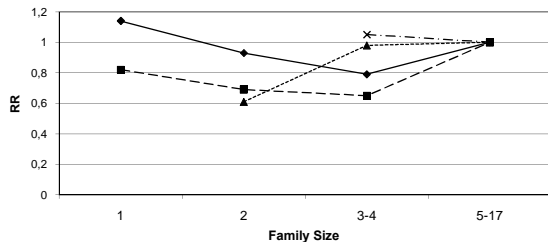

| birth order | RR (95% CI)      | RR (95% CI)      | RR (95% CI)       | Ref  |
|-------------|------------------|------------------|-------------------|------|
| any         | 1.14 (0.56-2.32) | 0.93 (0.51-1.70) | 0.79 (0.42-1.48)  | 1.00 |
| 1           | 0.82 (0.50-1.35) | 0.69 (0.42-1.14) | 0.65 (0.39-1.08)  | 1.00 |
| 2           | .                | 0.61 (0.24-1.51) | 0.98 (0.40-2.38)  | 1.00 |
| 3-4         | .                | .                | 1.05 (0.04-29.56) | 1.00 |

### Stomach Cancer (age at diag. ≥ 50)

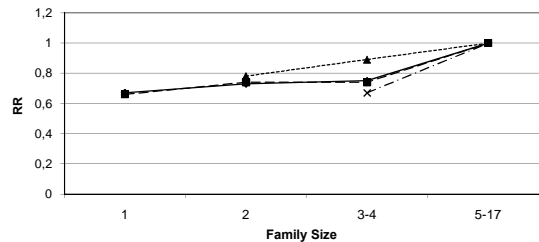

| birth order | RR (95% CI)             | RR (95% CI)             | RR (95% CI)             | Ref  |
|-------------|-------------------------|-------------------------|-------------------------|------|
| any         | <b>0.67</b> (0.56-0.81) | <b>0.73</b> (0.62-0.86) | <b>0.75</b> (0.64-0.88) | 1.00 |
| 1           | <b>0.66</b> (0.52-0.84) | <b>0.74</b> (0.58-0.95) | <b>0.74</b> (0.57-0.95) | 1.00 |
| 2           | .                       | 0.78 (0.55-1.09)        | 0.89 (0.64-1.24)        | 1.00 |
| 3-4         | .                       | .                       | <b>0.67</b> (0.50-0.89) | 1.00 |

### Lung Cancer (age at diag. <50)

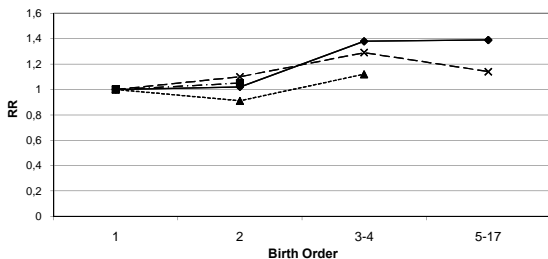

| family size | Ref  | RR (95% CI)      | RR (95% CI)             | RR (95% CI)             |
|-------------|------|------------------|-------------------------|-------------------------|
| any         | 1.00 | 1.02 (0.90-1.16) | <b>1.38</b> (1.21-1.59) | <b>1.39</b> (1.07-1.81) |
| 2           | 1.00 | 1.05 (0.86-1.29) | .                       | .                       |
| 3-4         | 1.00 | 0.91 (0.74-1.13) | 1.12 (0.92-1.37)        | .                       |
| 5-17        | 1.00 | 1.10 (0.69-1.75) | 1.29 (0.86-1.93)        | 1.14 (0.74-1.75)        |

### Lung Cancer (age at diag. ≥ 50)

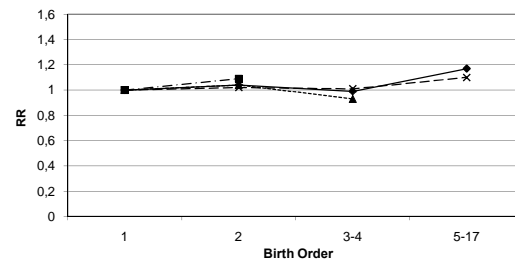

| family size | Ref  | RR (95% CI)      | RR (95% CI)      | RR (95% CI)      |
|-------------|------|------------------|------------------|------------------|
| any         | 1.00 | 1.04 (0.98-1.10) | 0.99 (0.91-1.08) | 1.17 (0.99-1.39) |
| 2           | 1.00 | 1.09 (0.98-1.21) | .                | .                |
| 3-4         | 1.00 | 1.04 (0.95-1.15) | 0.93 (0.82-1.05) | .                |
| 5-17        | 1.00 | 1.02 (0.86-1.22) | 0.99 (0.91-1.08) | 1.17 (0.99-1.39) |
